# Supplementary material for: Relational Dynamics in Dementia Care: A Qualitative Study of Australian and Japanese Family Experiences
Source: Research Square preprint supplement (doi:10.21203/rs.3.rs-7746623/v1), 2025-11-03
Supplement: Supplementary file 1 [file 8909275e04ca45e931af04af.docx]

**Appendix A: Interview Guide**

**Introduction**

1. **Introduction of Interviewer and Purpose of Interview**
   - Briefly introduce yourself and explain the purpose of the interview.
   - Inform the participant about the confidentiality and voluntary nature of the interview.
   - Obtain verbal or written consent to proceed with the interview.

**Section 1: Background Information**

1. **Participant Information**
   - Could you please tell me a little about yourself (age, relationship to the person with dementia, duration of caregiving, etc.)?
2. **Context of Caregiving**
   - Can you describe the living situation of your loved one with dementia (at home, in a care facility, etc.)?
   - How long have you been providing care for your loved one with dementia?

**Section 2: Understanding Daily Life and Relationships**

1. **Daily Activities**
   - Can you describe a typical day in your life as a caregiver?
   - What activities do you and your loved one with dementia do together?
2. **Changes in Relationship**
   - How has your relationship with your loved one changed since the onset of dementia?
   - Can you share any specific examples of how your interactions have evolved?
3. **Challenges and Coping Mechanisms**
   - What are some of the biggest challenges you face in your caregiving role?
   - How do you cope with these challenges?

**Conclusion**

**Closing Remarks**

- - Is there anything else you would like to share about your caring experience?
  - Thank the participant for their time and insights.

**Appendix B: Australian Participant Summary Table**

| **ID** | **Age** | **Caring relationship** | **Care recipient age** | **Living arrangement** | **Other caregiver**  **[Y/N]** | **Care needs** | **How many years of caring** | **Gender** | **Ethnicity** |
| --- | --- | --- | --- | --- | --- | --- | --- | --- | --- |
| A01 | 70s | Caring for father | 90s | In-home care, co-living | Y | All personal care and day to day | 3 | Female | Second generation polish |
| A02 | 38 | Caring for mother | 70s | In-home care, co-living | N | All personal care and day to day | 6 | Female | Second generation Chinese |
| A03 | 50s | Caring for father | 80s | In-home care, co-living | N | Day to day | 3 | Male | Second generation European |
| A04 | 60s | Caring for husband | 60s | In-home care, co-living | N | All personal care and day to day | 10 | Female | Australian |
| A05 | 60s | Caring for wife | 60s | Nursing home | Y | All personal care and day to day | 8 | Male | Australian |
| A06 | 20s | Caring for grandpa | 70s | In-home care, co-living | Y | All personal care and day to day | 3 | Female | Second generation Indian |
| A07 | 30s | Caring for father in law | 60s | In-home care; Daily visits | Y | All personal care and day to day | 3 | Female | First generation Singaporean |
| A08 | 40s | Caring for mum | 80s | In-home care; Daily visits | N | All personal care and day to day | 10 | Male | Second generation Lebanese |
| A09 | 40s | Caring for mum | 70s | In-home care; Occasional visits | Y | All personal care and day to day | 2 | Male | Frist generation British |
| A10 | 40s | Caring for grandma | 80s | Nursing Home | Y | All personal care and day to day | 6 | Female | Second generation South American |
| A11 | 60s | Caring for husband | 60s | In-home care, co-living | N | All personal care and day to day | 8 | Female | Australian |
| A12 | 70s | Caring for husband | 70s | In-home care, co-living | N | All personal care and day to day | 10 | Female | Australian |
| A13 | 50s | Caring for dad | 80s | In-home care; Occasional visits | Y | All personal care and day to day | 4 | Female | First generation Chinese |
| A14 | 20s | Caring for grandpa | 70s | In-home care, co-living | Y | All personal care and day to day | 2 | Female | Second generation Chinese |
| A15 | 30s | Caring for grandma | 70s | In-home care, co-living | Y | All personal care and day to day | 3 | Male | Australian |
| A16 | 20s | Caring for mother | 70s | In-home care, co-living | N | All personal care and day to day | 2 | Female | Second generation Hong Kong |
| A17 | 30s | Caring for father | 60s | In-home care; Occasional visits | Y | All personal care and day to day | 3 | Male | Second generation Chinese |
| A18 | 20s | Caring for aunt | 70s | In-home care, co-living | Y | All personal care and day to day | 2 | Female | Second generation Chinese |

**Appendix C:** **Japanese Participant Summary Table**

| **ID** | **Age** | **Caring relationship** | **Care Recipient Age** | **Living Arrangement** | **Other Caregiver** | **Nursing Care needs*** | **Years of Caring** | **Gender** |
| --- | --- | --- | --- | --- | --- | --- | --- | --- |
| J01 | 65 | Caring for mother | 90 | living apart | N | Nursing-care level 3 | 6 | Female |
| J02 | 39 | Caring for grandfather | 91 | co-resident | N | Nursing-care level 3 | 4 | Male |
| J03 | 60 | Caring for mother | 88 | co-resident | Y | Nursing-care level 5 | 20 | Female |
| J04 | 76, | Caring for husband | 80 | co-resident | Y | Nursing-care level 3 | 7 | Male |
| J05 | 83 | Caring for husband | 81 | co-resident | Y | Nursing-care level 1 | 6 | Male |
| J06 | 73 | Caring for mother | 96 | co-resident | Y | Nursing-care level 2 | 14 | Female |
| J07 | 65 | Caring for mother in-law | 90 | living apart | Y | Nursing-care level 3 | 6 | Female |
| J08 | 68 | Caring for mother | 90 | co-resident, living apart | Y | Nursing-care level 2 | 4 | Female |
| J09 | 47 | Caring for father | 80 | living apart | N | Nursing-care level 3 | 7 | Male |
| J10 | 60, 88 | Caring for mother | 83 | living apart-resident | N/Y | Nursing-care level 4 | 2 | Female |
| J11 | 70 | Caring for mother | 97 | co-resident | Y | Nursing-care level 1 | 1 | Female |
| J12 | 63 | Caring for parents | 92, 88 | nursing home | Y | Nursing-care level 4 | 1, 2 | Male |
| J13 | 59, 80s | Caring for mother | 84 | co-resident | Y | Nursing-care level 5 | 6 | Female |
| J14 | 66 | Caring for mother | 92 | nursing home | N | Nursing-care level 3, 5 | 13 | Female |
| J15 | 61 | Caring for mother | 84 | co-resident | Y | Nursing-care level 2 | 2 | Female |
| J16 | 87 | Caring for husband | 83 | co-resident | Y | Nursing-care level 2 | nan | Male |
| J17 | 71 | Caring for mother | 96 | co-resident | Y | Nursing-care level 5 | 2 | Female |
| J18 | 89 | Caring for step-sister | 83 | co-living in nursing care facility | N | Nursing-care level 2 | 1 | Male |
| J19 | 58 | Caring for mother | 85 | nursing home | Y | Nursing-care level 4 | 7 | Female |
| J20 | 58 | Caring for mother | 95 | co-resident | Y | Nursing-care level 2 | 12 | Female |

*Nursing Care Need Levels in Japan

| **Care Level** | **Japanese Term** | **Description** | **Typical Support Needs** |
| --- | --- | --- | --- |
| Level 1 | 要介護１ (Yōkaigo 1) | Lowest level of nursing care need. Person is mostly independent but requires occasional support. | Help with some instrumental activities of daily living (IADLs) such as shopping, cleaning, or bathing. May need partial supervision for safety. |
| Level 2 | 要介護２ (Yōkaigo 2) | Mild care needs. Physical or cognitive decline makes some daily tasks difficult. | Assistance with mobility (e.g., walking, standing), partial help with toileting or bathing, occasional supervision. |
| Level 3 | 要介護３ (Yōkaigo 3) | Moderate care needs. Daily life is difficult without frequent assistance. | Help with most activities of daily living (ADLs), such as dressing, toileting, bathing, eating. May require mobility aids or regular supervision. |
| Level 4 | 要介護４ (Yōkaigo 4) | High care needs. Person cannot manage daily life independently. | Full assistance with most ADLs, regular transfer support (bed ↔ chair), may need continuous supervision for safety, possible in-home nursing. |
| Level 5 | 要介護５ (Yōkaigo 5) | Highest level of care need. Person is bedridden or severely cognitively impaired. | Complete assistance in all ADLs, 24-hour care, often requires institutional care (nursing home or hospital). |
